<sup>2</sup>Tel-Aviv University, The Sackler Faculty of Medicine, Tel-Aviv, Israel, <sup>3</sup>Children's Hospital of Philadelphia, Division of Gastroenterology-Hepatology- and Nutrition, Philadelphia- Pennsylvania, United States, <sup>4</sup>Amsterdam University Medical Centers, Emma Children's Hospital, Amsterdam, The Netherlands, <sup>5</sup>University of Amsterdam, Tytgat Institute for Liver and Intestinal Research- Amsterdam Gastroenterology and Metabolism- Academic Medical Center, Amsterdam, The Netherlands, <sup>6</sup>IWK Health Center, Division of Gastroenterology and Nutrition, Halifax, Canada, <sup>7</sup>University of Alberta, Departments of Pediatrics and Physiology, Edmonton-Alberta, Canada

**Background:** Strategies that target the microbiome may offer an alternative therapeutic approach for Ulcerative Colitis (UC). The goal of the pilot trial was to evaluate the efficacy of a novel microbe-directed UC diet (UCD) for clinical remission, as well as use of antibiotics for dietary refractory patients as an alternative strategy for remission.

**Methods:** This was a prospective, single arm, open label, pilot study in patients aged 8–19, with a pediatric UC activity index (PUCAI) scores >10 on stable maintenance therapy. Patients failing to enter remission (PUCAI<10) on diet could receive a 14-day course of Amoxicillin, Metronidazole and Doxycycline (AMD), and were re-assessed on day 21. The primary endpoint was intention to treat (ITT) remission at week 6 with UCD.

**Results:** Twenty-four UCD treatment courses were given to 23 eligible children (mean age 15.3±2.9 years). Median PUCAI decreased from baseline 35 (30–40) to 12.5 (5–27.5) week 6 (P=0.001). Clinical remission with UCD alone was achieved in 9/24 (37.5%). Median calprotectin declined from baseline 818 (630.0–1880.0) to 592.0 (140.7–902.4) week 6. Eight patients received treatment with antibiotics after failing diet, 4/8 (50.0%) subsequently entered remission 3 weeks later.

**Conclusion:** The UC Diet appears to be effective for induction of remission in children with mild to moderate UC suggesting that diet could play a role in the disease. Sequential use of UCD followed by antibiotic therapy needs to be evaluated as a microbiome targeted steroid sparing strategy.

## P493

### Cost-effectiveness of venous thromboembolism prophylaxis after hospitalization in patients with Inflammatory Bowel Disease

K. Lee<sup>\*1</sup>, F. Lim<sup>2</sup>, J.F. Colombel<sup>3</sup>, C. Hur<sup>2</sup>, A. Faye<sup>3</sup>

<sup>1</sup>Columbia University Vagelos College of Physicians and Surgeons, Medicine- Division of Digestive and Liver Diseases, New York, United States, <sup>2</sup>Columbia University Irving Medical Center, Medicine- Division of Digestive and Liver Diseases, New York, United States, <sup>3</sup>Icahn School of Medicine at Mt. Sinai, The Dr. Henry D. Janowitz Division of Gastroenterology, New York, United States

**Background:** Patients with inflammatory bowel disease (IBD) have a 2- to 3-fold greater risk of venous thromboembolism (VTE) than the general population, with increased risk during hospitalization. However, recent evidence suggests that this increased risk persists post-discharge. As such, we aimed to determine the cost-effectiveness of post-discharge VTE prophylaxis among hospitalized patients with IBD.

**Methods:** A decision tree was used to compare inpatient prophylaxis alone versus 4 weeks of post-discharge VTE prophylaxis with rivaroxaban 10 mg/day. Our primary outcome was quality-adjusted

life years (QALYs) over one year, and strategies were compared using a willingness to pay of \$100,000/QALY from a societal perspective. Costs (in 2020 \$US), incremental cost-effectiveness ratios (ICERs), and number needed to treat (NNT) to prevent one VTE and VTE death were calculated. Deterministic 1-way and probabilistic analyses were performed to assess uncertainty within the model.

**Results:** Four-week post-discharge prophylaxis with rivaroxaban resulted in 1.68 higher QALYs per 1000 persons and an incremental cost of \$185,778 per QALY as compared to no post-discharge prophylaxis. The NNT to prevent a single VTE was 78 individuals, while the NNT to prevent a single VTE-related death was 3190 individuals. One-way sensitivity analyses showed that higher baseline VTE risk >4.5% or decreased cost of rivaroxaban ≤\$280 can reduce the ICER to <\$100,000/QALY. Probabilistic sensitivity analyses favored post-discharge prophylaxis in 26.5% of iterations.

**Table.** Cost-effectiveness analysis results

|                                      | Post-discharge VTE prophylaxis | No post-discharge VTE prophylaxis |
|--------------------------------------|--------------------------------|-----------------------------------|
| Cost (in 2020 \$US)                  | \$690.39                       | \$377.45                          |
| Incremental cost                     | \$312.94                       | -                                 |
| Effectiveness (QALYs)                | 0.99773                        | 0.99604                           |
| Incremental effectiveness            | 1.68 QALYs per 1000 persons    | -                                 |
| ICER                                 | \$185,778/QALY                 | -                                 |
| NNT to prevent one VTE               | 78                             | -                                 |
| NNT to prevent one VTE-related death | 3190                           | -                                 |

Abbreviations: QALY (Quality-Adjusted Life Years), ICER (Incremental Cost-Effectiveness Ratio), NNT (Number Needed to Treat), VTE (Venous Thromboembolism)

**Conclusion:** Four weeks of post-discharge VTE prophylaxis results in higher QALYs as compared to inpatient prophylaxis alone, and can prevent one post-discharge VTE among 78 patients with IBD. As such, post-discharge VTE prophylaxis in patients with IBD should be considered in a case-by-case scenario considering VTE risk profile, costs, and patient preference.

## P494

### Can Patients Monitor Response To Ustekinumab In The Real World?

A.J. Walsh<sup>\*1</sup>, L. Matini<sup>1</sup>, A. Kormilitzin<sup>2</sup>, J. Wilson<sup>1</sup>, S. Lyden<sup>1</sup>, L. Al-Hillawi<sup>1</sup>, R. Kantschuster<sup>1</sup>, L. White<sup>1</sup>, S. Payton<sup>1</sup>, O. Brain<sup>1</sup>, R. Palmer<sup>1</sup>, T. Ambrose<sup>1</sup>, J. Satsangi<sup>1</sup>, S.P.L. Travis<sup>1</sup>

<sup>1</sup>Oxford University Hospitals NHS Foundation Trust, Translational Gastroenterology Unit, Oxford, United Kingdom, <sup>2</sup>University of Oxford, Mathematical Institute, Oxford, United Kingdom

**Background:** Real time monitoring of patients with Crohn's disease (CD) gives us the opportunity to examine disease trajectory. We have demonstrated the feasibility of using a monitoring platform with patient reported data, collected prospectively and routinely in clinical practice. The question is whether it can be used for specific drugs

**Methods:** TrueColours-IBD (TC-IBD) is a real time, web based platform that through email prompts linked to questionnaires, collects longitudinal patient reported outcome measures (for CD, symptoms
